# Supplementary material for: Atypical Non-H2S-Producing Monophasic Salmonella Typhimurium ST3478 Strains from Chicken Meat at Processing Stage Are Adapted to Diverse Stresses
Source: Pathogens. 2020 Aug 26;9(9):701. doi: 10.3390/pathogens9090701 (PMC7557518; doi:10.3390/pathogens9090701)
Supplement: Supplementary file 1 [file pathogens-09-00701-s001.xlsx]

## Sheet: Table S1_Primers
	Table S1: List of primers and conditions used in the standard PCR assays.
	Target gene/region a	Gene product or region description	Primer name	Primers sequences (5’-3’) b	Amplicon size (bp)	Annealing temperature (oC)	No. of cycles	Primers reference
	Salmonella identification and characterization
	invA	Invasion protein	invA_1	ACAGTGCTCGTTTACGACCTGAAT	243	60	30x	[13]
			invA_2	AGACGACTGGTACTGATCGATAAT
	16S rRNA	16S ribosomal RNA	SEQA	AGAGTTTGATCHTGGYTYAGA	Variable	55	30x	[14]
			SEQB	ACGYTACCTTGTTACGACTTC
	Sdf I region	Region for Salmonella Enteritidis identification	sdf_F	CGTTCTTCTGGTACTTACGATGAC	333	65	30x	[71]
			sdf_R	TGTGTTTTATCTGATGCAAGAGG
	fljB	Flagellar gene of phase II	Sense-59	CAACAACAACCTGCAGCGTGTGCG	1389	64	35x	[15]
			Antisense-83	GCCATATTTCAGCCTCTCGCCCG
	fliB-fliA intergenic region	Intergenic region for identification of Salmonella serotypes	FFLIB	CTGGCGACGATCTGTCGATG	250 or 1000	64	35x	[15]
			RFLIA	GCGGTATACAGTGAATTCAC
	Antibiotic Resistance
	blaTEM	Beta-lactamase	TEM-F	ATGAGTATTCAACATTTCCG	900	58	35x	[72]
			TEM-R	CTGACAGTTACCAATGCTTA
	cmlA1-like	Phenicol resistant antibiotic efflux pump	cmlA_F	TGTCATTTACGGCATACTCG	435	55	30x	[73]
			cmlA_R	ATCAGGCATCCCATTCCCAT
	catA	Chloramphenicol acetyltransferase	catA_F	CCACCGTTGATATATCCC	623	55	30x	[73]
			catA_R	CCTGCCACTCATCGCAGT
	floR	Phenicol resistant antibiotic efflux pump	floR_F	CACGTTGAGCCTCTATAT	868	55	30x	[73]
			floR_R	ATGCAGAAGTAGAACGCG
	strA	Aminoglycoside 3'-phosphotransferase	strA_F1	GCAGGAGGAACAGGAGGGTGC	587	68	30x	This study
			strA_R1	CCCAAGTCAGAGGGTCCAATCG
	strB	Streptomycin 3''-kinase	strB_F1	TCCAGCCTCGTTTGGAAAGT	597	58	30x	This study
			strB_R1	TGCAATGCGTCTAGGATCGA
	aadA	Aminoglycoside (3'') (9) adenylyltransferase	ant(3’’)-LA_F	GTGGATGGCGGCCTGAAGCC	526	58	30x	[73]
			ant(3’’)-LA_B	ATTGCCCAGTCGGCAGCG
	aac(3)-IV	Aminoglycoside N(3)-acetyltransferase	aac(3)-IV_F	GTTACACCGGACCTTGGA	674	55	30x	[73]
			aac(3)-IV_R	AACGGCATTGAGCGTCAG
	aphA1	Aminoglycoside phosphotransferase	aphA_F	AAACGTCTTGCTCGAGGC	461	55	30x	[73]
			aphA_R	CAAACCGTTATTCATTCGTGA
	sul1	Sulfonamide resistant dihydropteroate synthase	sul1_F	CGGCGTGGGCTACCTGAACG	433	69	30x	[74]
			sul1_R	GCCGATCGCGTGAAGTTCCG
	sul2	Sulfonamide resistant dihydropteroate synthase	sul2_F	GCGCTCAAGGCAGATGGCATT	293	69	30x	[74]
			sul2_R	GCGTTTGATACCGGCACCCGT
	sul3	Sulfonamide resistant dihydropteroate synthase	sul3_R	CATCTGCAGCTAACCTAGGGCTTTGGA	789	52	30x	[75]
			sul3_F	GAGCAAGATTTTTGGAATCG
	tetA	Tetracycline efflux pump	tetA_F	GCTACATCCTGCTTGCCT	210	55	30x	[73]
			tetA_R	CATAGATCGCCGTGAAGA
	tetB	Tetracycline efflux pump	tetB_F	TTGGTTAGGGGCAAGTTTTG	600	55	30x	[73]
			tetB_R	GTAATGGGCCAATAACACCG
	dfrA1-like	Trimethoprim resistant dihydrofolate reductase	dfrA1_F	GTGAAACTATCACTAATGG	473	53	30x	[73]
			dfrA1_R	CCCTTTTGCCAGATTTGG
	dfrA12	Trimethoprim resistant dihydrofolate reductase	dfrA12_F	ACTCGGAATCAGTACGCA	462	58	30x	[73]
			dfrA12_R	GTGTACGGAATTACAGCT
	dfrA17	Trimethoprim resistant dihydrofolate reductase	dfrA17_F	GATTTCTGCAGTGTCAGA	384	40	30x	[73]
			dfrA17_R	CTCAGGCATTATAGGGAA
	Metal Tolerance
	pcoD	Copper inner membrane pump	pcoD_F	CTGGCCACACTTGCCTGGGG	500	55	25x	[16]
			pcoD_R	CACGCTACGGCGCCCAGAAT
	silA	Silver inner-membrane proton/cation antiporter	silA_Fw	GCAAGACCGGTAAAGCAGAG	936	62	30x	[16]
			silA_Rv	CCTGCCAGTACAGGAACCAT
	merA	Mercuric reductase	merA_1F	ACCATCGGCGGCACCTGCGT	1238	65	25x	[76]
			merA_5R	ACCATCGTCAGGTAGGGGAAC
	arsB	As[III] efflux antiporter	arsB_1F	CGTTACAAACAGCACAGGYA	833	56	30x	[17]
			arsB_1R	TSATGGCNGCNGGKTTTATT
	terF	Tellurite resistance protein	terF_Fw1	ATAGCACTGGATCGTGTTCC	990	60	30x	[17]
			terF_Rv	TTCATCGATCCACGGTCTG
	a All the PCR assays were conducted in a Bio-Rad T100TM Thermo Cycler using the NZYTaq II 2x Green Master Mix (invA, 16S rDNA, blaTEM, cmlA-catA-floR, strA-strB-aadA-aac(3)-IV-aphA1, sul1-sul2-sul3, tetA-tetB, dfrA1-dfrA12-dfrA17, pcoD, arsB and terF genes), Supreme NZYTaq II 2x Colourless Master Mix (invA from total DNA and merA genes) or KAPA Taq Ready Mix (silA, fljB genes and fliB-fliA interg…
	b Degenerated bases: H = A, C or T; K = G or T; N = A, T, C, G; S = G or C; Y = C or T.

## Sheet: Table S2_Strain data
	Table S2: Metadata available from Enterobase as well as acquired genes and chromosomal mutations conferring antibiotic resistance and metal tolerance in the 16 analysed ST3478 Salmonella strains.
	Isolate			Country		Source		Acquired antibiotic resistance genesa											Acquired metal tolerance genes					Chromosomal ciprofloxacin mutations
		ST	cgST		Year																			parCb					gyrA
								Beta-lactams		Aminoglycosides					Sulphonamides		Tetracyclines		Copper	Silver	Arsenic	Mercury		T255 (ACC)	N395 (AAC)	S469 (TCC)	A620 (GCG)
	P1-C10	3478	237418	POR	2018	PM		blaTEM-1		strA	strB	aac(6')-Iaa			sul2		tet(B)		pcoASBDGRC, silAPSCBRGF	silAPSCBRGF	arsA2A1BCD2D1R	merARCTDPE		S (TCC)	S (AGC)	A (GCC)	T (ACA)		WT
	17-19-18-8100337-J	3478	119627	SCO	2018	H		blaTEM-1		strA	strB	aac(6')-Iaa	ant(3'')-Ia		sul2		tet(B)		pcoASBDGRC, silAPSCBRGF	silAPSCBRGF	arsA2A1BCD2D1R	merARCTDPE		S (TCC)	S (AGC)	A (GCC)	T (ACA)		WT
	420621	3478	130544	ENG	2017	H		blaTEM-1		strA	strB	aac(6')-Iaa			sul2		tet(B)		pcoASBDGRC, silAPSCBRGF	silAPSCBRGF	arsA2A1BCD2D1R	merARCTDPE		S (TCC)	S (AGC)	A (GCC)	T (ACA)		WT
	610760	3478	146228	ENG	2018	H		blaTEM-1		strA	strB	aac(6')-Iaa			sul2		tet(B)		pcoASBDGRC, silAPSCBRGF	silAPSCBRGF	arsA2A1BCD2D1R	merARCTDPE		S (TCC)	S (AGC)	A (GCC)	T (ACA)		WT
	633460	3478	146228	ENG	2018	H		blaTEM-1		strA	strB	aac(6')-Iaa			sul2		tet(B)		pcoASBDGRC, silAPSCBRGF	silAPSCBRGF	arsA2A1BCD2D1R	merARCTDPE		S (TCC)	S (AGC)	A (GCC)	T (ACA)		WT
	423092	3478	169315	ENG	2017	H		blaTEM-1		strA	strB	aac(6')-Iaa			sul2		tet(B)		pcoASBDGRC, silAPSCBRGF	silAPSCBRGF	arsA2A1BCD2D1R	merARCTDPE		S (TCC)	S (AGC)	A (GCC)	T (ACA)		WT
	201606976	3478	167413	FRA	2016	H		blaTEM-1		strA	strB	aac(6')-Iaa			sul2		tet(B)		pcoASBDGRC, silAPSCBRGF	silAPSCBRGF	arsA2A1BCD2D1R	merARCTDPE		S (TCC)	S (AGC)	A (GCC)	T (ACA)		WT
	301895	3478	173162	ENG	2016	H		blaTEM-1									tet(B)		pcoASBDGRC, silAPSCBRGF	silAPSCBRGF	arsA2A1BCD2D1R	merARCTDPE		S (TCC)	S (AGC)	A (GCC)	T (ACA)		WT
	Isolate 11	3478	45128	POR	U	U		blaTEM-1		strA	strB	aac(6')-Iaa			sul2		tet(B)		pcoASBDGRC, silAPSCBRGF	silAPSCBRGF	arsA2A1BCD2D1R	merARCTDPE		S (TCC)	S (AGC)	A (GCC)	T (ACA)		WT
	Isolate 12	3478	45128	POR	U	U		blaTEM-1		strA	strB	aac(6')-Iaa			sul2		tet(B)		pcoASBDGRC, silAPSCBRGF	silAPSCBRGF	arsA2A1BCD2D1R	merARCTDPE		S (TCC)	S (AGC)	A (GCC)	T (ACA)		WT
	Isolate 14	3478	45129	POR	U	U		blaTEM-1		strA	strB	aac(6')-Iaa			sul2		tet(B)		pcoASBDGRC, silAPSCBRGF	silAPSCBRGF	arsA2A1BCD2D1R	merARCTDPE		S (TCC)	S (AGC)	A (GCC)	T (ACA)		WT
	Isolate 13	3478	45129	POR	U	U		blaTEM-1		strA	strB	aac(6')-Iaa			sul2		tet(B)		pcoASBDGRC, silAPSCBRGF	silAPSCBRGF	arsA2A1BCD2D1R	merARCTDPE		S (TCC)	S (AGC)	A (GCC)	T (ACA)		WT
	Isolate 15	3478	45131	POR	U	U		blaTEM-1		strA	strB	aac(6')-Iaa			sul2				pcoASBDGRC, silAPSCBRGF	silAPSCBRGF	arsA2A1BCD2D1R	merARCTDPE		S (TCC)	S (AGC)	A (GCC)	T (ACA)		WT
	Isolate 16	3478	45131	POR	U	U		blaTEM-1		strA	strB	aac(6')-Iaa			sul2				pcoASBDGRC, silAPSCBRGF	silAPSCBRGF	arsA2A1BCD2D1R	merARCTDPE		S (TCC)	S (AGC)	A (GCC)	T (ACA)		WT
	FOHM UI Salm	3478	204413	SWE	2019	H		blaTEM-1		strA	strB	aac(6')-Iaa			sul2		tet(B)		pcoASBDGRC, silAPSCBRGF	silAPSCBRGF	arsA2A1BCD2D1R	merARCTDPE		S (TCC)	S (AGC)	A (GCC)	T (ACA)		WT
	MS170354	3478	97148	IRL	2017	H		blaTEM-1		strA	strB	aac(6')-Iaa			sul2		tet(B)		pcoASBDGRC, silAPSCBRGF	silAPSCBRGF	arsA2A1BCD2D1R	merARCTDPE		S (TCC)	S (AGC)	A (GCC)	T (ACA)		WT
	Abbreviations: ST, sequence type; ENG, England; FRA, France; IRL, Ireland; POR, Portugal; SCO, Scotland; SWE, Sweden. H, human; PM, poultry meat; U, unknown; WT, wild-type
	aAcquired resistance genes are presented in different grey tones according with the highest homology they present with strain references retrieved in ResFinder (https://cge.cbs.dtu.dk/services/ResFinder/).
	Homology:				1		≥90%<95%
	bAll are unknown mutations

## Sheet: Table S3_ST and cgMLST
	Table S3: Results of cgMLST and hierarchical clustering (HC) of the Salmonella ST3478 strains obtained through Enterobase pipeline.
					Hierarchical Clustering (HC) scheme for cgMLST
	Isolate ID	Country of sampling/isolation	ST (Achtman 7 housekeeping genes)	cgST	HC0 (indistinguishable)	HC2	HC5	HC10	HC20	HC50	HC100	HC200	HC400	HC900 (ceBG)	HC2000 (super lineage)	HC2600	HC2850 (subspecies)
	P1-C10	Portugal	3478	237418	237418	237418	45128	2	2	2	2	2	2	2	2	2	2
	17-19-18-8100337-J	Scotland	3478	119627	119627	119627	45128	2	2	2	2	2	2	2	2	2	2
	420621	England	3478	130544	130544	130544	130544	2	2	2	2	2	2	2	2	2	2
	610760	England	3478	146228	146228	146228	146228	2	2	2	2	2	2	2	2	2	2
	633460	England	3478	146228	146228	146228	146228	2	2	2	2	2	2	2	2	2	2
	423092	England	3478	169315	169315	97148	45128	2	2	2	2	2	2	2	2	2	2
	201606976	France	3478	167413	167413	167413	167413	2	2	2	2	2	2	2	2	2	2
	301895	England	3478	173162	173162	173162	173162	2	2	2	2	2	2	2	2	2	2
	Isolate 11	Portugal	3478	45128	45128	45128	45128	2	2	2	2	2	2	2	2	2	2
	Isolate 12	Portugal	3478	45128	45128	45128	45128	2	2	2	2	2	2	2	2	2	2
	Isolate 14	Portugal	3478	45129	45129	45128	45128	2	2	2	2	2	2	2	2	2	2
	Isolate 13	Portugal	3478	45129	45129	45128	45128	2	2	2	2	2	2	2	2	2	2
	Isolate 15	Portugal	3478	45131	45131	45128	45128	2	2	2	2	2	2	2	2	2	2
	Isolate 16	Portugal	3478	45131	45131	45128	45128	2	2	2	2	2	2	2	2	2	2
	FOHM UI Salm	Sweden	3478	204413	204413	204413	204413	2	2	2	2	2	2	2	2	2	2
	MS170354	Ireland	3478	97148	97148	97148	45128	2	2	2	2	2	2	2	2	2	2
	Orange, HC2 and HC5 45128 group
	Blue, HC2 and HC5 146228 group
	Green, HC2 97148 group

## Sheet: Table S4_Matrix SNPs_refST34
	Table S4: Results of mapping SNPs of Salmonella ST3478 genomes obtained with the CSI Phylogeny-based pipeline.
country	Isolate		P1-C10	17-19-18-8100337-J	420621	610760	633460	423092	201606976	301895	Isolate 11	Isolate 12	Isolate 14	Isolate 13	Isolate 15	Isolate 16	FOHM UI Salm	MS170354
		Country	Portugal	Scotland	England	England	England	England	France	England	Portugal	Portugal	Portugal	Portugal	Portugal	Portugal	Sweden	Ireland
	P1-C10	Portugal	0	13	25	17	18	18	32	13	12	12	8	8	14	11	35	15
	17-19-18-8100337-J	Scotland	13	0	24	16	17	17	31	12	11	11	9	9	15	12	34	14
	420621	England	25	24	0	26	27	27	41	24	25	25	21	21	27	24	44	26
	610760	England	17	16	26	0	1	21	35	16	17	17	13	13	19	16	38	18
	633460	England	18	17	27	1	0	22	36	17	18	18	14	14	20	17	39	19
	423092	England	18	17	27	21	22	0	34	17	18	18	14	14	20	17	25	5
	201606976	France	32	31	41	35	36	34	0	31	32	32	28	28	34	31	51	33
	301895	England	13	12	24	16	17	17	31	0	13	13	9	9	15	12	34	14
	Isolate 11	Portugal	12	11	25	17	18	18	32	13	0	0	4	4	10	7	35	15
	Isolate 12	Portugal	12	11	25	17	18	18	32	13	0	0	4	4	10	7	35	15
	Isolate 14	Portugal	8	9	21	13	14	14	28	9	4	4	0	0	6	3	31	11
	Isolate 13	Portugal	8	9	21	13	14	14	28	9	4	4	0	0	6	3	31	11
	Isolate 15	Portugal	14	15	27	19	20	20	34	15	10	10	6	6	0	3	37	17
	Isolate 16	Portugal	11	12	24	16	17	17	31	12	7	7	3	3	3	0	34	14
	FOHM UI Salm	Sweden	35	34	44	38	39	25	51	34	35	35	31	31	37	34	0	24
	MS170354	Ireland	15	14	26	18	19	5	33	14	15	15	11	11	17	14	24	0
	Reference strain: S. 4,[5],12:i:- SO4698-09 (accession number NZ_LN999997.1)
	blue, 0 SNPs
	green, >1-≤10 SNPs
	grey, >10-≤20
